# Supplementary material
Source: HighWire-hosted journal article supplement (https://innovations.bmj.com/highwire/filestream/139089/field_highwire_adjunct_files/1/bmjinnov-2021-000928supp002_data_supplement.pdf)
Supplement: bmjinnov-2021-000928supp002_data_supplement.pdf [file bmjinnov-2021-000928supp002_data_supplement.pdf]

Brief impact assessment of Qatar Foundation's Ability Friendly program  
تقييم موجز لأثر برنامج مؤسسة "قطر" لكل القدرات

Q1 Have you noticed any positive changes in your child's development during the time of their participation in the Ability Friendly Program? هل لاحظت أي تغييرات إيجابية في نمو طفلك أثناء فترة مشاركته في برنامج مؤسسة "قطر" لكل القدرات

Answered: 61 Skipped: 0

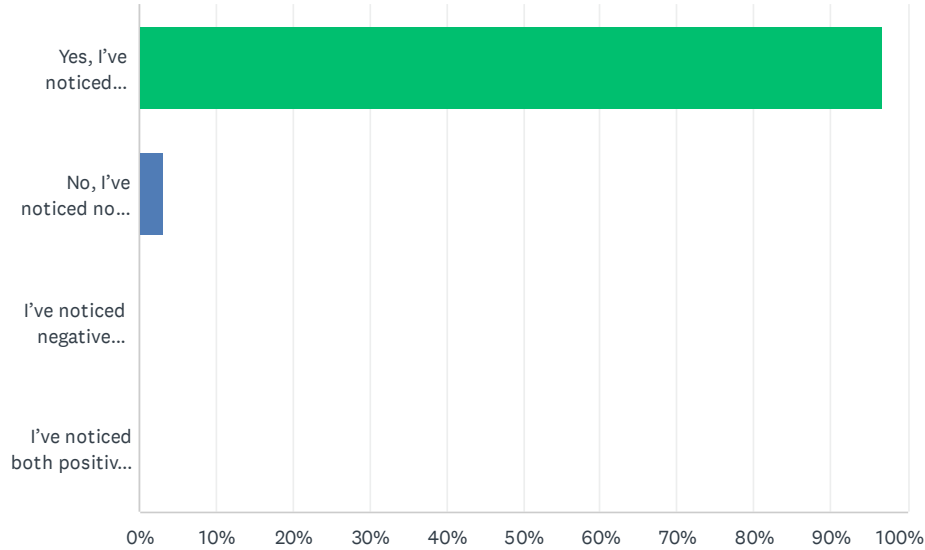

| ANSWER CHOICES                                                                                                                 | RESPONSES |
|--------------------------------------------------------------------------------------------------------------------------------|-----------|
| Yes, I've noticed positive changes نعم، لاحظت تغييرات إيجابية                                                                  | 96.72% 59 |
| No, I've noticed no changes in my child's development لا، لم ألاحظ أي تغييرات                                                  | 3.28% 2   |
| I've noticed negative changes in my child's development لاحظت تغييرات سلبية في نمو طفلي                                        | 0.00% 0   |
| I've noticed both positive and negative changes in my child's development لاحظت تغييرات إيجابية وسلبية في نمو طفلي على حد سواء | 0.00% 0   |
| TOTAL                                                                                                                          | 61        |

Brief impact assessment of Qatar Foundation's Ability Friendly program  
تقييم موجز لأثر برنامج مؤسسة "قطر" لكل القدرات

Q2 If you have noticed positive change, how would you describe it? في  
حال لاحظت تغيراً إيجابياً، كيف يمكنك أن تصفه؟

Answered: 61 Skipped: 0

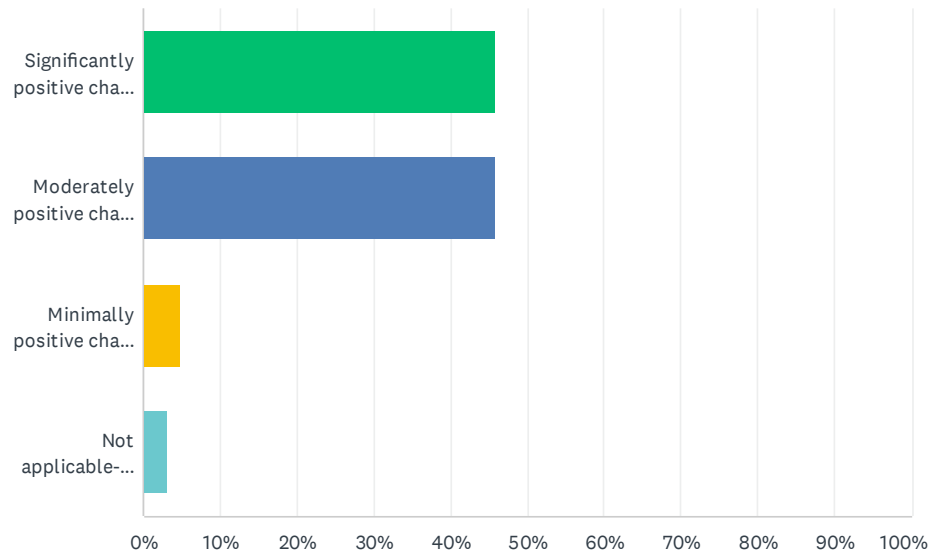

| ANSWER CHOICES                                                                        | RESPONSES |
|---------------------------------------------------------------------------------------|-----------|
| Significantly positive change<br>تغير إيجابي بصورة كبيرة وملحوظة                      | 45.90% 28 |
| Moderately positive change<br>تغير إيجابي متوسط                                       | 45.90% 28 |
| Minimally positive change<br>تغير إيجابي بسيط                                         | 4.92% 3   |
| Not applicable- I've seen no positive changes<br>لا ينطبق - لم أرى أي تغييرات إيجابية | 3.28% 2   |
| TOTAL                                                                                 | 61        |

Brief impact assessment of Qatar Foundation's Ability Friendly program "قطر" لكل القدرات  
تقييم موجز لأثر برنامج مؤسسة

Q3 If you have noticed positive changes, which (if any) of these statements reflects these changes? إن لاحظت أي تغييرات إيجابية، فأَي من العبارات التالية تعبر عن تلك التغييرات؟ (إن وجدت)

Answered: 61 Skipped: 0

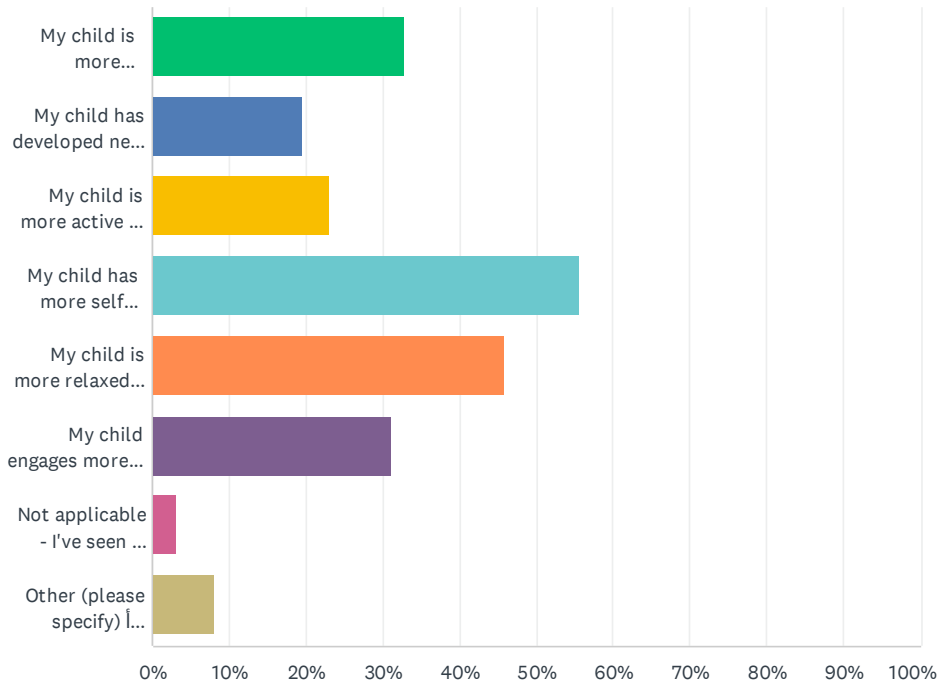

| ANSWER CHOICES                                                                                                            | RESPONSES |
|---------------------------------------------------------------------------------------------------------------------------|-----------|
| My child is more communicative<br>طفلي يتواصل بشكل أكبر                                                                   | 32.79% 20 |
| My child has developed new friendships<br>كون طفلي أصدقاء جدد                                                             | 19.67% 12 |
| My child is more active at home<br>طفلي أكثر حيوية في المنزل                                                              | 22.95% 14 |
| My child has more self confidence<br>طفلي لديه ثقة أكبر بنفسه                                                             | 55.74% 34 |
| My child is more relaxed following the Ability Friendly sessions<br>"أصبح طفلي أكثر هدوءاً عقب جلسات برنامج " لكل القدرات | 45.90% 28 |
| My child engages more in other activities<br>طفلي يشارك بصورة أكبر في أنشطة أخرى                                          | 31.15% 19 |
| Not applicable - I've seen no positive changes<br>لا ينطبق - لم أرى أي تغييرات إيجابية                                    | 3.28% 2   |
| Other (please specify)<br>(أخرى) يرجى تحديدها                                                                             | 8.20% 5   |
| Total Respondents: 61                                                                                                     |           |

Brief impact assessment of Qatar Foundation's Ability Friendly program  
تقييم موجز لأثر برنامج مؤسسة "قطر" لكل القدرات

Q4 As the primary carer for your child, have you developed any new friendships as a result of the Ability Friendly sessions?  
باعتبارك الراعي الأساسي لطفلك، هل كونت أي صداقات جديدة نتيجة لحضورك جلسات "للك القدرات"

Answered: 60 Skipped: 1

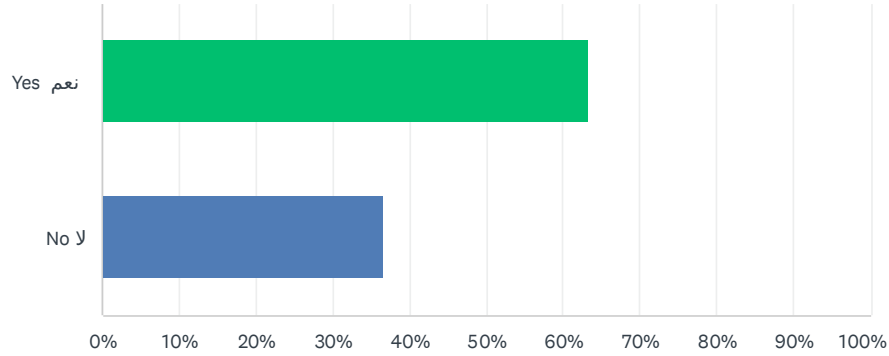

| ANSWER CHOICES | RESPONSES |    |
|----------------|-----------|----|
| Yes نعم        | 63.33%    | 38 |
| No لا          | 36.67%    | 22 |
| TOTAL          |           | 60 |

Brief impact assessment of Qatar Foundation's Ability Friendly program  
تقييم موجز لأثر برنامج مؤسسة "قطر" لكل القدرات

Q5 As the primary caregiver for your child, do the Ability Friendly sessions provide you with respite care/time that you would not otherwise enjoy?

باعتبارك الراعي الأساسي لطفلك، هل أتاحت لك جلسات " لكل القدرات " متنفساً/ وقتاً مستقطعاً لم تكن لتحظى به لولا تلك الجلسات؟

Answered: 60 Skipped: 1

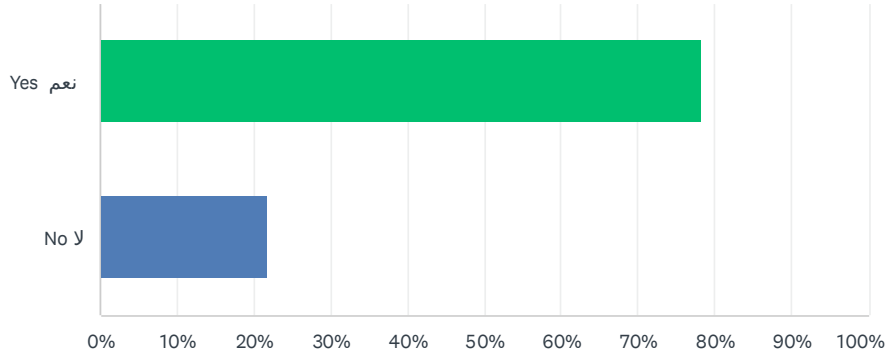

| ANSWER CHOICES | RESPONSES |    |
|----------------|-----------|----|
| Yes نعم        | 78.33%    | 47 |
| No لا          | 21.67%    | 13 |
| TOTAL          |           | 60 |

Brief impact assessment of Qatar Foundation's Ability Friendly program  
تقييم موجز لأثر برنامج مؤسسة "قطر" لكل القدرات

Q6 Would you recommend the Ability Friendly sessions to other parents of children with special needs?  
هل توصي بجلسات "لكل القدرات" للآباء آخرين لهم أطفال من ذوي الاحتياجات الخاصة؟

Answered: 60 Skipped: 1

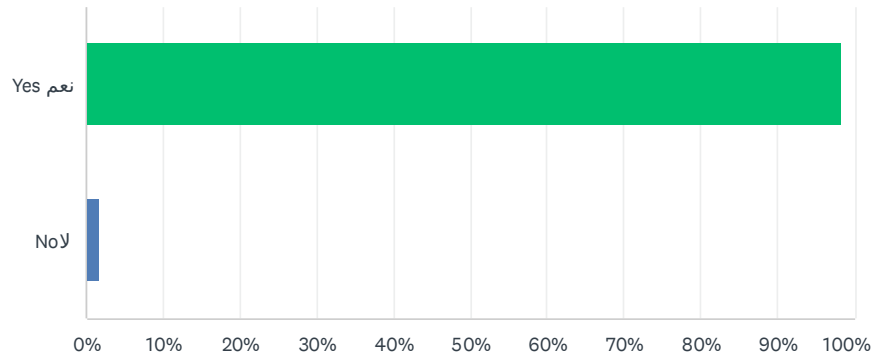

| ANSWER CHOICES | RESPONSES |    |
|----------------|-----------|----|
| Yes نعم        | 98.33%    | 59 |
| No لا          | 1.67%     | 1  |
| TOTAL          |           | 60 |
